# Supplementary material for: Leishmanicidal Activity of Betulin Derivatives in Leishmania amazonensis; Effect on Plasma and Mitochondrial Membrane Potential, and Macrophage Nitric Oxide and Superoxide Production
Source: MDPI journal article supplement (doi:10.3390/microorganisms9020320), 2021-02-04
Supplement: s1 [file s1]

# Simple betulin derivatives

| Compound           | Chemical formula                                | Molecular weight (g/mol) | Chemical structure                                                                   |
|--------------------|-------------------------------------------------|--------------------------|--------------------------------------------------------------------------------------|
| <b>1</b> (betulin) | C <sub>30</sub> H <sub>50</sub> O <sub>2</sub>  | 442.7                    | 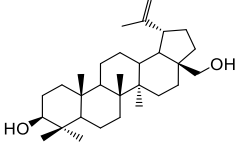   |
| <b>2</b>           | C <sub>30</sub> H <sub>52</sub> O <sub>2</sub>  | 444.8                    |    |
| <b>3</b>           | C <sub>32</sub> H <sub>52</sub> O <sub>3</sub>  | 484.8                    |    |
| <b>4</b>           | C <sub>34</sub> H <sub>54</sub> O <sub>4</sub>  | 526.8                    |   |
| <b>5</b>           | C <sub>36</sub> H <sub>60</sub> O <sub>4</sub>  | 568.9                    |  |
| <b>6</b>           | C <sub>40</sub> H <sub>62</sub> O <sub>6</sub>  | 638.9                    |  |
| <b>7</b>           | C <sub>35</sub> H <sub>58</sub> O <sub>3</sub>  | 526.9                    |  |
| <b>8</b>           | C <sub>39</sub> H <sub>56</sub> O <sub>3</sub>  | 572.8                    |  |
| <b>9</b>           | C <sub>36</sub> H <sub>53</sub> NO <sub>3</sub> | 547.8                    |  |
| <b>10</b>          | C <sub>40</sub> H <sub>64</sub> O <sub>3</sub>  | 592.9                    |  |

|           |                      |       |                                                                                      |
|-----------|----------------------|-------|--------------------------------------------------------------------------------------|
| <b>11</b> | $C_{30}H_{48}O_3$    | 456.7 | 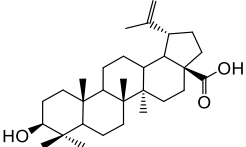   |
| <b>12</b> | $C_{30}H_{46}O_2$    | 438.7 |    |
| <b>13</b> | $C_{30}H_{48}O_3$    | 456.7 |    |
| <b>14</b> | $C_{30}H_{46}O_3$    | 454.7 |    |
| <b>15</b> | $C_{38}H_{52}O_5$    | 588.4 |    |
| <b>16</b> | $C_{36}H_{55}NO_6$   | 597.8 |   |
| <b>17</b> | $C_{30}H_{48}N_2O_2$ | 468.7 |  |
| <b>18</b> | $C_{30}H_{49}NO_2$   | 455.7 |  |
| <b>19</b> | $C_{32}H_{52}O_3$    | 484.8 |  |
| <b>20</b> | $C_{30}H_{46}O_3$    | 454.7 |  |

#### Heterocyclic betulin derivatives

|           |                      |       |                                                                                      |
|-----------|----------------------|-------|--------------------------------------------------------------------------------------|
| <b>21</b> | $C_{42}H_{57}N_3O_6$ | 699.9 | 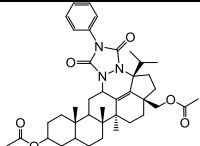 |
|-----------|----------------------|-------|--------------------------------------------------------------------------------------|

|           |                      |       |                                                                                      |
|-----------|----------------------|-------|--------------------------------------------------------------------------------------|
| <b>22</b> | $C_{38}H_{57}N_3O_6$ | 651.9 | 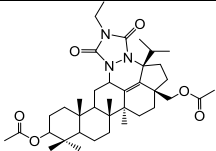   |
| <b>23</b> | $C_{41}H_{63}N_3O_6$ | 694.0 |    |
| <b>24</b> | $C_{39}H_{59}N_3O_6$ | 665.9 |    |
| <b>25</b> | $C_{37}H_{55}N_3O$   | 637.9 |    |
| <b>26</b> | $C_{35}H_{51}N_3O_6$ | 609.8 |    |
| <b>27</b> | $C_{33}H_{49}N_3O_4$ | 551.8 |   |
| <b>28</b> | $C_{33}H_{47}N_3O_4$ | 549.8 |  |
