# Supplementary material for: Leishmanicidal Activity of Betulin Derivatives in Leishmania amazonensis; Effect on Plasma and Mitochondrial Membrane Potential, and Macrophage Nitric Oxide and Superoxide Production
Source: MDPI journal article supplement (doi:10.3390/microorganisms9020320), 2021-02-04
Supplement: s1 [file s1]

## EFFECT OF LEADING COMPOUNDS ON PLASMA MEMBRANE POTENTIAL ( $\Delta\Psi_p$ )

Effect of leading compounds on plasma membrane potential ( $\Delta\Psi_p$ ) in reference *Leishmania amazonensis* LTB0016 promastigotes.

| Holm-Sidak's multiple comparisons test | Predicted (LS) mean diff. | Significant? | Summary | Adjusted P Value |
|----------------------------------------|---------------------------|--------------|---------|------------------|
| Control vs. BT18a                      | -31.73                    | Yes          | *       | 0.0414           |
| Control vs. BT18b                      | -48.96                    | Yes          | **      | 0.0034           |
| Control vs. BT22a                      | -2.900                    | No           | ns      | 0.7966           |
| Control vs. BT22b                      | -12.51                    | No           | ns      | 0.4761           |
| Control vs. VAL                        | -32.59                    | Yes          | *       | 0.0414           |
| Control vs. CytB                       | -100.4                    | Yes          | ****    | <0.0001          |
| Control vs. DIDS                       | 43.03                     | Yes          | **      | 0.0080           |

Test was performed using GraphPad Prism version 8.0.2/2019 for Windows.

Effect of leading compounds on plasma membrane potential ( $\Delta\Psi_p$ ) in *Leishmania amazonensis* VE98MR promastigotes isolated from patient.

| Holm-Sidak's multiple comparisons test | Predicted (LS) mean diff. | Significant? | Summary | Adjusted P Value |
|----------------------------------------|---------------------------|--------------|---------|------------------|
| Control vs. BT18a                      | -23.59                    | Yes          | **      | 0.0059           |
| Control vs. BT18b                      | -43.49                    | Yes          | ****    | <0.0001          |
| Control vs. BT22a                      | -2.749                    | No           | ns      | 0.6649           |
| Control vs. BT22b                      | -9.146                    | No           | ns      | 0.2996           |
| Control vs. VAL                        | -28.71                    | Yes          | **      | 0.0016           |
| Control vs. CytB                       | -61.83                    | Yes          | ****    | <0.0001          |
| Control vs. DIDS                       | 33.37                     | Yes          | ***     | 0.0005           |

Test was performed using GraphPad Prism version 8.0.2/2019 for Windows.

Effect of leading compounds on plasma membrane potential ( $\Delta\Psi_p$ ) in *Leishmania amazonensis* VE2000MM promastigotes isolated from patient.

| Holm-Sidak's multiple comparisons test | Mean Diff. | Significant? | Summary | Adjusted P Value |
|----------------------------------------|------------|--------------|---------|------------------|
| Control vs. BT18a                      | -25.36     | Yes          | **      | 0.0024           |
| Control vs. BT18b                      | -28.75     | Yes          | ***     | 0.0009           |
| Control vs. BT22a                      | -7.797     | No           | ns      | 0.1861           |
| Control vs. BT22b                      | -12.37     | No           | ns      | 0.0871           |
| Control vs. VAL                        | -15.17     | No           | ns      | 0.0504           |
| Control vs. CytB                       | -51.10     | Yes          | ****    | <0.0001          |
| Control vs. DIDS                       | 24.82      | Yes          | **      | 0.0024           |

Test was performed using GraphPad Prism version 8.0.2/2019 for Windows.

## EFFECT OF LEADING COMPOUNDS ON MITOCHONDRIAL MEMBRANE POTENTIAL ( $\Delta\Psi_m$ )

Effect of leading compounds on mitochondrial membrane potential ( $\Delta\Psi_m$ ) in reference *Leishmania amazonensis* LTB0016 promastigotes.

| Bonferroni's multiple comparisons test | Mean Diff. | 95.00% CI of diff. | Significant? | Summary | Adjusted P Value |
|----------------------------------------|------------|--------------------|--------------|---------|------------------|
| Control vs. BT18a                      | 0.3467     | 0.03658 to 0.6568  | Yes          | *       | 0.0251           |
| Control vs. BT18b                      | 0.9167     | 0.6066 to 1.227    | Yes          | ****    | <0.0001          |
| Control vs. BT22a                      | -0.09333   | -0.4034 to 0.2168  | No           | ns      | >0.9999          |
| Control vs. BT22b                      | 0.3367     | 0.02658 to 0.6468  | Yes          | *       | 0.0303           |
| Control vs. FCCP                       | 0.4633     | 0.1532 to 0.7734   | Yes          | **      | 0.0030           |
| Control vs. OLIG                       | 1.053      | 0.7432 to 1.363    | Yes          | ****    | <0.0001          |

Test was performed using GraphPad Prism version 8.0.2/2019 for Windows.

Effect of leading compounds on mitochondrial membrane potential ( $\Delta\Psi_m$ ) in *Leishmania amazonensis* VE98MR promastigotes isolated from patient.

| Bonferroni's multiple comparisons test | Mean Diff. | 95.00% CI of diff. | Significant? | Summary | Adjusted P Value | A-? |       |
|----------------------------------------|------------|--------------------|--------------|---------|------------------|-----|-------|
| Control vs. BT18a                      | 0.2467     | -0.1781 to 0.6714  | No           | ns      | 0.5524           | B   | BT18a |
| Control vs. BT18b                      | 0.7833     | 0.3586 to 1.208    | Yes          | ***     | 0.0005           | C   | BT18b |
| Control vs. BT22a                      | -0.01333   | -0.4381 to 0.4114  | No           | ns      | >0.9999          | D   | BT22a |
| Control vs. BT22b                      | 0.1367     | -0.2881 to 0.5614  | No           | ns      | >0.9999          | E   | BT22b |
| Control vs. FCCP                       | 0.5800     | 0.1552 to 1.005    | Yes          | **      | 0.0061           | F   | FCCP  |
| Control vs. OLIG                       | 0.8033     | 0.3786 to 1.228    | Yes          | ***     | 0.0004           | G   | OLIG  |

Test was performed using GraphPad Prism version 8.0.2/2019 for Windows.

Effect of leading compounds on mitochondrial membrane potential ( $\Delta\Psi_m$ ) in *Leishmania amazonensis* VE2000MM promastigotes isolated from patient.

| Bonferroni's multiple comparisons test | Mean Diff. | 95.00% CI of diff. | Significant? | Summary | Adjusted P Value |
|----------------------------------------|------------|--------------------|--------------|---------|------------------|
| Control vs. BT18a                      | 0.1300     | -0.2570 to 0.5170  | No           | ns      | >0.9999          |
| Control vs. BT18b                      | 0.4100     | 0.02299 to 0.7970  | Yes          | *       | 0.0353           |
| Control vs. BT22a                      | -0.04667   | -0.4337 to 0.3403  | No           | ns      | >0.9999          |
| Control vs. BT22b                      | 0.2000     | -0.1870 to 0.5870  | No           | ns      | 0.7753           |
| Control vs. FCCP                       | 0.4267     | 0.03965 to 0.8137  | Yes          | *       | 0.0275           |
| Control vs. OLIG                       | 0.8267     | 0.4397 to 1.214    | Yes          | ***     | 0.0001           |

Test was performed using GraphPad Prism version 8.0.2/2019 for Windows.

## EFFECT OF LEADING COMPOUNDS ON THE PRODUCTION OF NITRIC OXIDE (NO) BY MACROPHAGES

Effect of leading compounds on the production of nitric oxide (NO) by healthy macrophages.

| Bonferroni's multiple comparisons test | Mean Diff. | 95.00% CI of diff. | Significant? | Summary | Adjusted P Value |
|----------------------------------------|------------|--------------------|--------------|---------|------------------|
| Control vs. BT18a                      | 0.4200     | -1.395 to 2.235    | No           | ns      | >0.9999          |
| Control vs. BT18b                      | 0.2033     | -1.611 to 2.018    | No           | ns      | >0.9999          |
| Control vs. BT22a                      | 0.5267     | -1.288 to 2.341    | No           | ns      | >0.9999          |
| Control vs. BT22b                      | 0.6767     | -1.138 to 2.491    | No           | ns      | >0.9999          |
| Control vs. MLF                        | -2.337     | -4.151 to -0.5221  | Yes          | **      | 0.0095           |
| Control vs. AmB                        | -3.553     | -5.368 to -1.739   | Yes          | ***     | 0.0003           |

Test was performed using GraphPad Prism version 8.0.2/2019 for Windows.

Effect of leading compounds on the production of nitric oxide (NO) by infected macrophages with reference *Leishmania amazonensis* LTB0016.

| Bonferroni's multiple comparisons test | Mean Diff. | 95.00% CI of diff. | Significant? | Summary | Adjusted P Value |
|----------------------------------------|------------|--------------------|--------------|---------|------------------|
| Control vs. BT18a                      | -0.7767    | -4.731 to 3.178    | No           | ns      | >0.9999          |
| Control vs. BT18b                      | -3.040     | -6.994 to 0.9143   | No           | ns      | 0.1926           |
| Control vs. BT22a                      | -1.127     | -5.081 to 2.828    | No           | ns      | >0.9999          |
| Control vs. BT22b                      | -1.740     | -5.694 to 2.214    | No           | ns      | >0.9999          |
| Control vs. MLF                        | -15.29     | -19.24 to -11.33   | Yes          | ****    | <0.0001          |
| Control vs. AmB                        | -21.34     | -25.30 to -17.39   | Yes          | ****    | <0.0001          |

Test was performed using GraphPad Prism version 8.0.2/2019 for Windows.

Effect of leading compounds on the production of nitric oxide (NO) by infected macrophages with *Leishmania amazonensis* VE98MR.

| Bonferroni's multiple comparisons test | Mean Diff. | 95.00% CI of diff. | Significant? | Summary | Adjusted P Value |
|----------------------------------------|------------|--------------------|--------------|---------|------------------|
| Control vs. BT18a                      | -0.3633    | -3.130 to 2.403    | No           | ns      | >0.9999          |
| Control vs. BT18b                      | -2.737     | -5.503 to 0.02961  | No           | ns      | 0.0532           |
| Control vs. BT22a                      | -1.687     | -4.453 to 1.080    | No           | ns      | 0.4718           |
| Control vs. BT22b                      | -0.6367    | -3.403 to 2.130    | No           | ns      | >0.9999          |
| Control vs. MLF                        | -12.13     | -14.90 to -9.364   | Yes          | ****    | <0.0001          |
| Control vs. AmB                        | -19.78     | -22.55 to -17.02   | Yes          | ****    | <0.0001          |

Test was performed using GraphPad Prism version 8.0.2/2019 for Windows.

Effect of leading compounds on the production of nitric oxide (NO) by infected macrophages with *Leishmania amazonensis* VE2000MM.

| Bonferroni's multiple comparisons test | Mean Diff. | 95.00% CI of diff. | Significant? | Summary | Adjusted P Value |
|----------------------------------------|------------|--------------------|--------------|---------|------------------|
| Control vs. BT18a                      | -0.7000    | -3.943 to 2.543    | No           | ns      | >0.9999          |
| Control vs. BT18b                      | -0.8933    | -4.137 to 2.350    | No           | ns      | >0.9999          |
| Control vs. BT22a                      | -0.9200    | -4.163 to 2.323    | No           | ns      | >0.9999          |
| Control vs. BT22b                      | -0.6233    | -3.867 to 2.620    | No           | ns      | >0.9999          |
| Control vs. MLF                        | -11.66     | -14.90 to -8.417   | Yes          | ****    | <0.0001          |
| Control vs. AmB                        | -18.67     | -21.91 to -15.42   | Yes          | ****    | <0.0001          |

Test was performed using GraphPad Prism version 8.0.2/2019 for Windows.

## EFFECT OF LEADING COMPOUNDS ON THE PRODUCTION OF SUPEROXIDE ANION ( $O_2^-$ ) BY MACROPHAGES

Effect of leading compounds on the production of superoxide anion ( $O_2^-$ ) by healthy macrophages.

| Bonferroni's multiple comparisons test | Mean Diff. | 95.00% CI of diff. | Significant? | Summary | Adjusted P Value |
|----------------------------------------|------------|--------------------|--------------|---------|------------------|
| Control vs. BT18a                      | -0.1000    | -0.6130 to 0.4130  | No           | ns      | >0.9999          |
| Control vs. BT18b                      | -0.1667    | -0.6796 to 0.3463  | No           | ns      | >0.9999          |
| Control vs. BT22a                      | -0.04000   | -0.5530 to 0.4730  | No           | ns      | >0.9999          |
| Control vs. BT22b                      | 0.2333     | -0.2796 to 0.7463  | No           | ns      | 0.8999           |
| Control vs. AmB                        | -0.3533    | -0.8663 to 0.1596  | No           | ns      | 0.2698           |

Test was performed using GraphPad Prism version 8.0.2/2019 for Windows.

Effect of leading compounds on the production of superoxide anion ( $O_2^-$ ) by infected macrophages with reference *Leishmania amazonensis* LTB0016.

| Bonferroni's multiple comparisons test | Mean Diff. | 95.00% CI of diff.   | Significant? | Summary | Adjusted P Value |
|----------------------------------------|------------|----------------------|--------------|---------|------------------|
| Control vs. BT18a                      | -0.4500    | -0.9002 to 0.0002318 | No           | ns      | 0.0501           |
| Control vs. BT18b                      | -0.5333    | -0.9836 to -0.08310  | Yes          | *       | 0.0188           |
| Control vs. BT22a                      | -0.3633    | -0.8136 to 0.08690   | No           | ns      | 0.1425           |
| Control vs. BT22b                      | -0.2567    | -0.7069 to 0.1936    | No           | ns      | 0.5047           |
| Control vs. AmB                        | -0.6400    | -1.090 to -0.1898    | Yes          | **      | 0.0057           |

Test was performed using GraphPad Prism version 8.0.2/2019 for Windows.

Effect of leading compounds on the production of superoxide anion ( $O_2^-$ ) by infected macrophages with *Leishmania amazonensis* VE98MR.

| Bonferroni's multiple comparisons test | Mean Diff. | 95.00% CI of diff. | Significant? | Summary | Adjusted P Value |
|----------------------------------------|------------|--------------------|--------------|---------|------------------|
| Control vs. BT18a                      | -0.1767    | -0.5970 to 0.2437  | No           | ns      | >0.9999          |
| Control vs. BT18b                      | -0.5233    | -0.9437 to -0.1030 | Yes          | *       | 0.0137           |
| Control vs. BT22a                      | -0.2667    | -0.6870 to 0.1537  | No           | ns      | 0.3605           |
| Control vs. BT22b                      | -0.2233    | -0.6437 to 0.1970  | No           | ns      | 0.6155           |
| Control vs. AmB                        | -0.7333    | -1.154 to -0.3130  | Yes          | **      | 0.0013           |

Test was performed using GraphPad Prism version 8.0.2/2019 for Windows.

Effect of leading compounds on the production of superoxide anion ( $O_2^-$ ) by infected macrophages with *Leishmania amazonensis* VE2000MM.

| Bonferroni's multiple comparisons test | Mean Diff. | 95.00% CI of diff.  | Significant? | Summary | Adjusted P Value |
|----------------------------------------|------------|---------------------|--------------|---------|------------------|
| Control vs. BT18a                      | 0.03333    | -0.3030 to 0.3697   | No           | ns      | >0.9999          |
| Control vs. BT18b                      | -0.1633    | -0.4997 to 0.1730   | No           | ns      | 0.7742           |
| Control vs. BT22a                      | -0.06000   | -0.3964 to 0.2764   | No           | ns      | >0.9999          |
| Control vs. BT22b                      | -0.1633    | -0.4997 to 0.1730   | No           | ns      | 0.7742           |
| Control vs. AmB                        | -0.3767    | -0.7130 to -0.04030 | Yes          | *       | 0.0264           |

Test was performed using GraphPad Prism version 8.0.2/2019 for Windows.
